# Supplementary material for: A copper based catalyst for poly-urethane synthesis from discarded motherboard
Source: Royal Society of Chemistry journal article supplement (doi:10.1039/c6ra14506j), 2016-01-01
Supplement: c6ra14506j1.pdf [file c6ra14506j1.pdf]

Electronic Supplementary Material (ESI) for RSC Advances.

## Electronic Supplementary Information (ESI)

### A Copper based Catalyst for Poly-Urethane synthesis from Discarded Motherboard

Soumitra Barman, Bibudha Parasar, Pradip Kundu, and Soumyajit Roy<sup>\*a,b</sup>

Eco-Friendly Applied Materials Laboratory, Department of Chemical  
Sciences, New Campus, IISER-Kolkata, India; School of Chemistry and Materials  
Engineering, Changshu Institute of Technology, Changshu, P. R. China

E-mail: s.roy@iiserkol.ac.in

#### 1 Calculation of Acid value and Hydroxyl value

##### 1.1 Acid values of the bamboo polyol

Acid value of the prepared bamboo polyol is calculated according to a previously reported procedure and is subsequently used for determination of hydroxyl value.<sup>1</sup> 1 g bamboo-polyol sample is first mixed with 20 mL dioxane-water solution (4/1, v/v). The resulting mixture is titrated against 1 M NaOH till the pH reaches 8.3 to indicate the end-point.

##### 1.2 Calculation of Acid value of the bamboo polyol

$$\text{Acid Value} = (V_{\text{NaOH}(\text{sample})} - V_{\text{NaOH}(\text{blank})}) \times N_{\text{NaOH}} \times 56.1 / W_{\text{sample}}$$

Where,

$V_{\text{NaOH}(\text{sample})}$  = volume of NaOH standard solution consumed in sample titration (mL)

$V_{\text{NaOH}(\text{blank})}$  = volume of NaOH standard solution consumed in blank titration (mL)

$W_{\text{sample}}$  = sample weight (g)

$N_{NaOH}$  = equivalent concentration of NaOH standard solution (M) = 1(M)

### Measurement result

| n  | Sample(g) | $[V_{NaOH(sample)} - V_{NaOH(blank)}]$ (ml) | Acid Value(mg/g) |
|----|-----------|---------------------------------------------|------------------|
| 1. | 1.0001    | 0.4                                         | <b>16.83</b>     |
| 2. | 1.0003    | 0.3                                         |                  |
| 3. | 1.0004    | 0.3                                         |                  |

### 1.3 Hydroxyl value of bamboo polyol

Phthalic anhydride solution is prepared by dissolving 150 g phthalic anhydride in a 1 L mixture of dioxane and pyridine (9/1, v/v). 10 mL of the phthalic anhydride solution is mixed with 1 g of polyol sample and the final mixture is added into a 150 mL beaker covered with aluminum foil. The beaker is put into a boiling water bath for 20 min. After cooling it down, 20 mL of dioxane-water solution (4/1, v/v) and 5 mL of water are added to the beaker. The resulting mixture is titrated against 1 M NaOH till the pH reaches pH 8.3 to indicate the end-point. Blank titration is conducted using the same procedure.

### 1.4 Calculation of Hydroxyl value of the bamboo polyol

$$\text{Hydroxyl value} = (V_{NaOH(blank)} - V_{NaOH(sample)}) \times N_{NaOH} \times \frac{56.1}{W_{sample}} + \text{Acid value}$$

Where,

$V_{NaOH(sample)}$  = volume of NaOH standard solution consumed in sample titration (mL)

$V_{NaOH(blank)}$  = volume of NaOH standard solution consumed in blank titration (mL)

$W_{sample}$  = sample weight (g)

$N_{NaOH}$  = equivalent concentration of NaOH standard solution (M).

## Measurement result

| n  | Sample(g) | [V <sub>NaOH(blank)</sub> -V <sub>NaOH(NaOH)</sub> ] (ml) | Hydroxyl Value(mg/g) |
|----|-----------|-----------------------------------------------------------|----------------------|
| 1. | 1.0000    | 3.0                                                       | <b>185.13</b>        |
| 2. | 1.0003    | 3.0                                                       |                      |
| 3. | 1.0002    | 3.0                                                       |                      |

## 2 TGA data of DBSNa and Cu-based catalyst

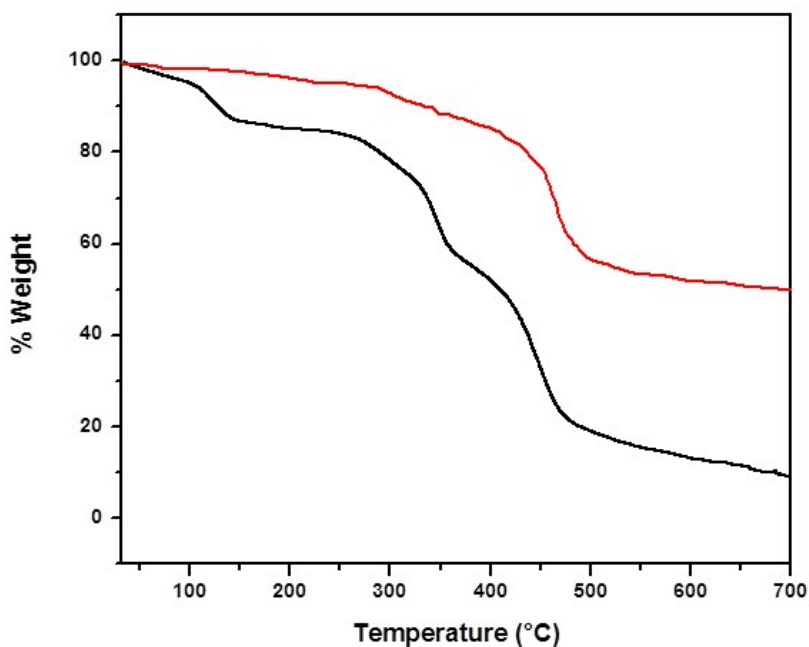

Fig. S1 TGA measurements of DBSNa (in red) and Cu-based catalyst (in black).

## 3 Model reactions with IPDI and Benzyl alcohol

### 3.1 Preparation of Benzyl((5-(((benzyloxy)carbonyl)amino)-1,3,3-trimethylcyclohexyl)methyl)carbamate

In a 50 ml round bottom flask, IPDI (1 mmol) and Benzyl alcohol (2.2 mmol) was taken and dissolved in 10 ml acetonitrile. Then Cu-based catalyst (5 mol%) was added to the solution

and heated at 60<sup>o</sup> C. The progress of the reaction was controlled by TLC. Product was separated by column chromatography with 5% EtOAc in hexane as eluent.

<sup>1</sup>H NMR (400 MHz, CDCl<sub>3</sub>): δ = 7.53-7.49 (m, 1H), 7.3 (m, 10H), 7.21-7.18 (m, 1H), 4.61 (s, 4H), 4.14-4.10 (m, 1H), 3.18 (m, 2H), 1.08-1.04 (m, 6H), 1.02-0.89 (m, 9H).

<sup>13</sup>C NMR (100 MHz, CDCl<sub>3</sub>): δ = 156.8, 155.6, 140.8, 128.3, 127.9, 126.7, 64.7, 54.6, 46.7, 44.4, 36.1, 34.8, 31.5, 27.3, 22.9, 13.9

**Table S1**

| IPDI  | Benzyl Alcohol | Catalyst used     | Amount of catalyst used | Reaction has occurred (Yes/No) | Time (h) | Yield (%) |
|-------|----------------|-------------------|-------------------------|--------------------------------|----------|-----------|
| 1mmol | 2.2 mmol       | DBSNa             | 5mol%                   | No                             | NA       | NA        |
| 1mmol | 2.2 mmol       | Cu Powder         | 5mol%                   | Yes                            | 18       | 63        |
| 1mmol | 2.2mmol        | Cu-based Catalyst | 5mol%                   | Yes                            | 6        | 85        |

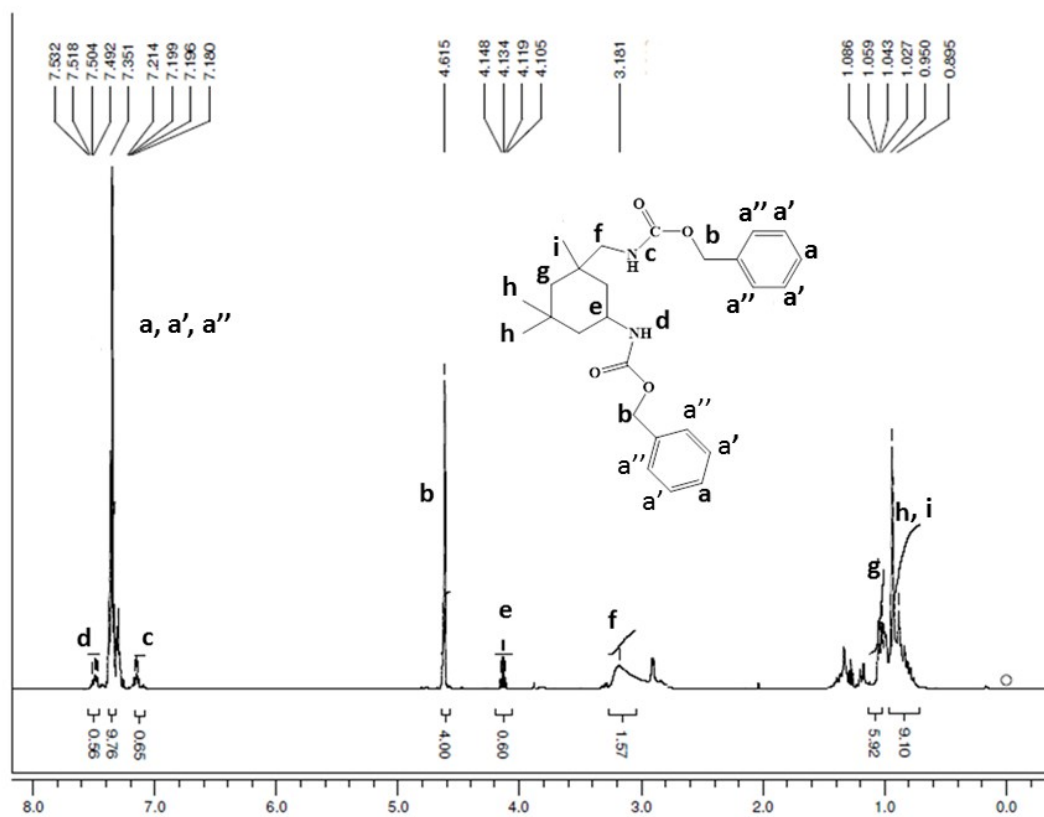

**Fig. S2**  $^1\text{H}$  NMR Spectra ( $\text{CDCl}_3$ ,  $25^\circ\text{C}$ ) of Benzyl((5-(((benzyloxy)carbonyl)amino)-1,3-trimethylcyclohexyl)methyl)carbamate.

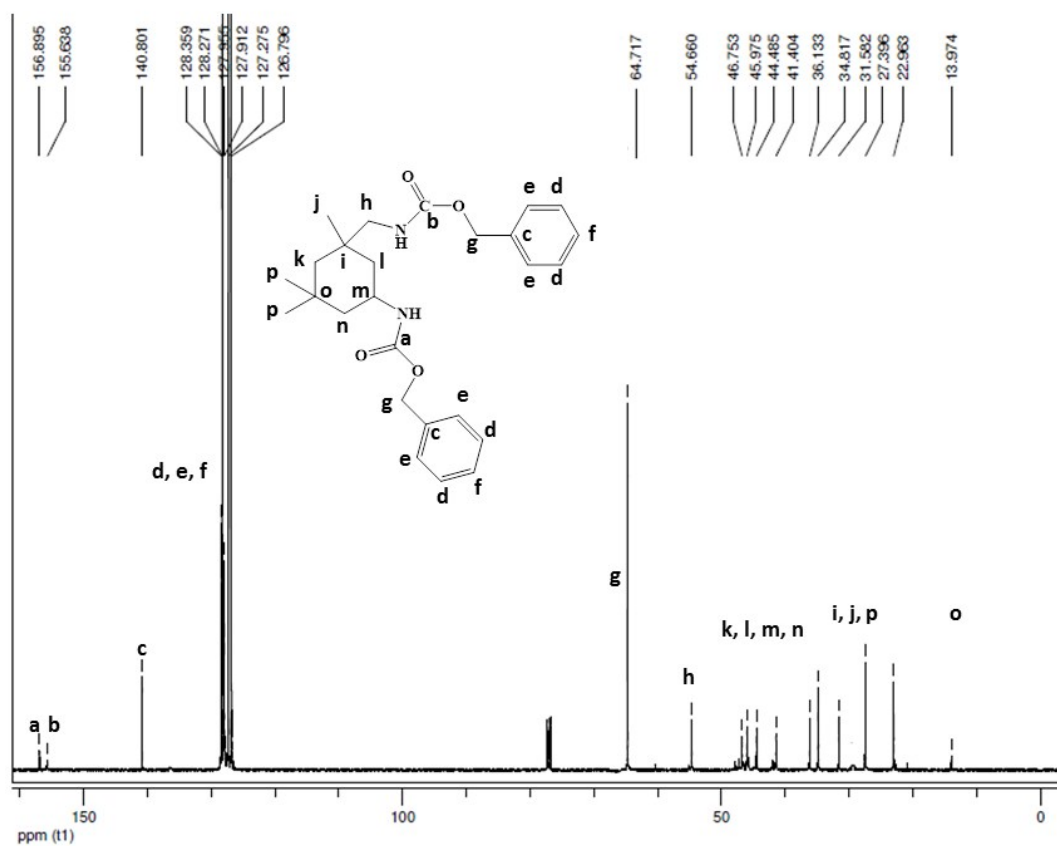

**Fig. S3**  $^{13}\text{C}$  NMR spectra ( $\text{CDCl}_3$ ,  $25^\circ\text{C}$ ) of Benzyl((5-(((benzyloxy)carbonyl)amino)-1,3,3-trimethylcyclohexyl)methyl)carbamate.

## References

1. L. L. Gao, Y. H. Liu, H. Lei, H. Peng and R. Ruan, *J. Appl. Polym. Sci.*, 2010, **116**, 1694–1699.
